## **Effect of Exogenous Amino Acids on Yield and Quality of Tartary Buckwheat in Non-saline and Saline-alkali Soil**

Jin-Nan Song, Ya-Qi Wang, Fa-Liang Li, Yan-Jiang Hu, Hong-Bing Yang\*

### **Disclaimer Statement**

The authors have withdrawn this manuscript (BIORXIV/2019/887778) entitled “Effect of Exogenous Amino Acids on Yield and Quality of Tartary Buckwheat in Non-saline and Saline-alkali Soil” because it requires adding new data and further modifications. Therefore, the authors do not wish this work to be cited (<https://www.biorxiv.org/content/10.1101/2019.12.24.887778v5>) as reference for the project.

If you have any questions, please contact the corresponding author.

Hong-Bing Yang
